# Supplementary material
Source: PubMed Central journal article supplement (PMC4096686)
Supplement: NIHMS598840-supplement-301146R1_Acknowledgment_Permissions.pdf [file NIHMS598840-supplement-301146R1_Acknowledgment_Permissions.pdf]

## Circulation Research

---

**From:** Elfy Chiang <elfychiang@gmail.com>  
**Sent:** Thursday, September 26, 2013 4:48 AM  
**To:** circulation.research@circresearch.com  
**Subject:** Permission to be acknowledged in CIRCRES/2013/301146

Dear editors,

I would like to give the permission to be acknowledged in the review with the manuscript number CIRCRES/2013/301146.

Thank you.

Elfy Chinag (Chun-Lin Chiang)  
+886(0)2 2785-5696\*1165

## Circulation Research

---

**From:** Bueno Fernandez, Marta <mbueno@pitt.edu>  
**Sent:** Wednesday, September 18, 2013 4:37 PM  
**To:** circulation.research@circresearch.com  
**Subject:** manuscript number is CIRCRES/2013/301146

Dr. Chillian,

Here I give my permission to be acknowledged in the manuscript CIRCRES/2013/301146 by Dr. Lai et al.

Thanks,

Dr. Bueno

---

Marta Bueno, PhD  
Research Associate  
Mora's Lab @ Vascular Medicine Institute  
University of Pittsburgh School of Medicine  
E1200-24B Biomedical Science Tower  
200 Lothrop Street  
Pittsburgh, PA 15260  
Tel: 412-624-2132  
Fax: 412-648-9009  
[www.vmi.pitt.edu](http://www.vmi.pitt.edu)

## Circulation Research

---

**From:** Sergei Snovida <s.snovida@gmail.com>  
**Sent:** Monday, September 23, 2013 9:38 PM  
**To:** circulation.research@circresearch.com  
**Subject:** Acknowledgement

Dear Dr. Chilian,

My name is Sergei Snovida and am writing to you to confirm that I have given my permission to the authors of manuscript CIRCRES/2013/301146 for my name to be used in the Acknowledgements section of their manuscript. Thank you.

Best regards,

Sergei Snovida

Sent from my iPhone=
